# Supplementary material for: A selective ER‐phagy exerts procollagen quality control via a Calnexin‐FAM134B complex
Source: PubMed Central journal article supplement (PMC6331724; doi:10.15252/embj.201899847), 2018-12-17

Uncropped gels with size marker indications

**FIGURE 1J**

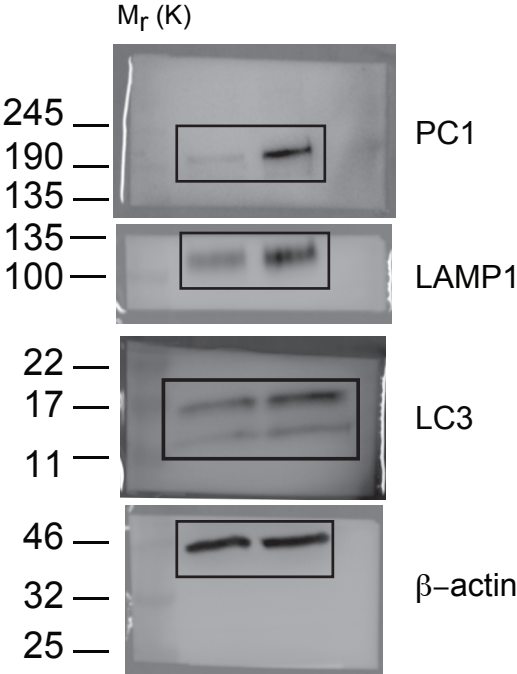

Supplement: EMBJ-38-e99847-s006.pdf [file EMBJ-38-e99847-s006.pdf]
