# Supplementary material for: A selective ER‐phagy exerts procollagen quality control via a Calnexin‐FAM134B complex
Source: PubMed Central journal article supplement (PMC6331724; doi:10.15252/embj.201899847), 2018-12-17

# Uncropped gels with size marker indications

## FIGURE 4A

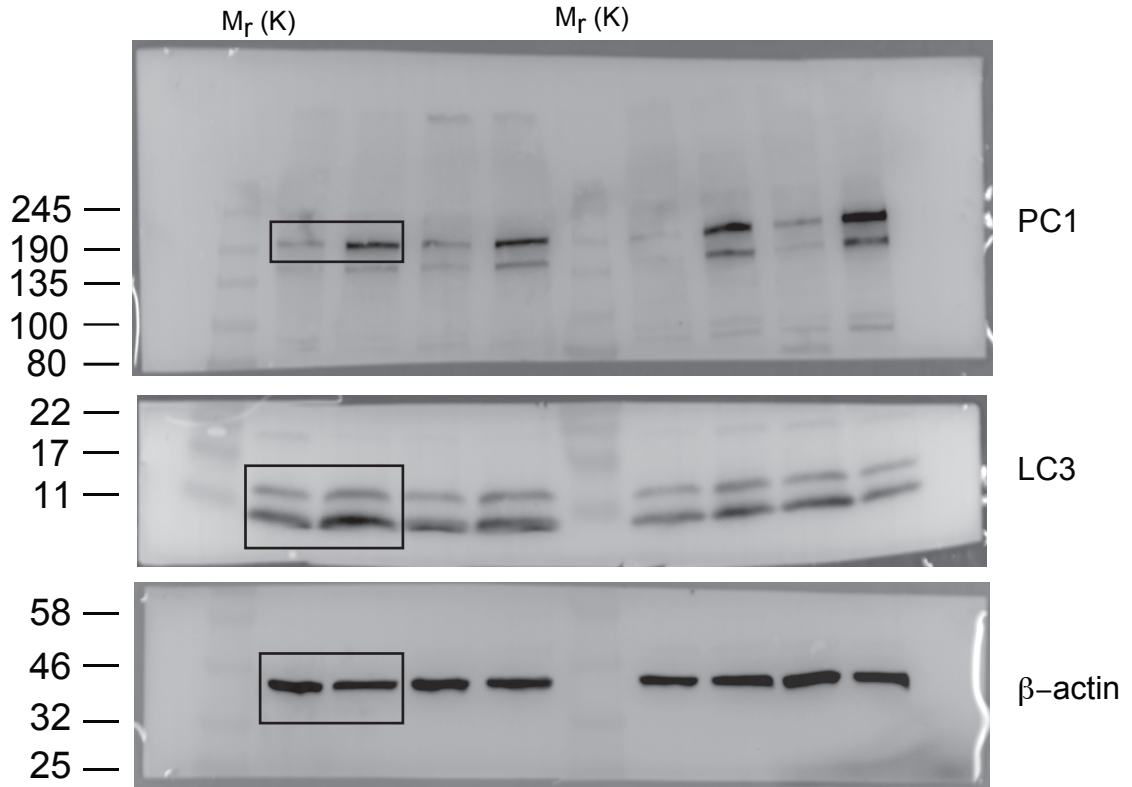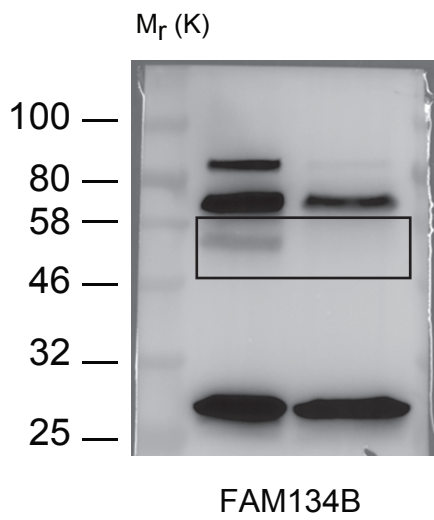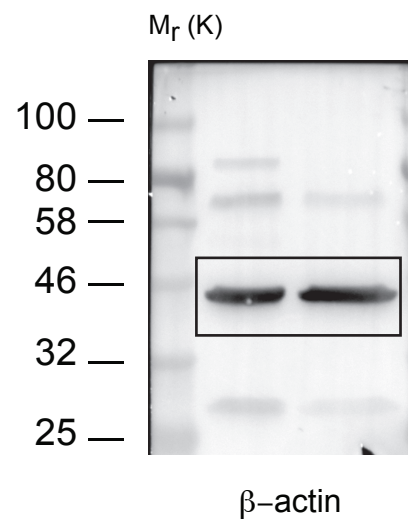

Supplement: EMBJ-38-e99847-s007.pdf [file EMBJ-38-e99847-s007.pdf]
