# Supplementary material for: A selective ER‐phagy exerts procollagen quality control via a Calnexin‐FAM134B complex
Source: PubMed Central journal article supplement (PMC6331724; doi:10.15252/embj.201899847), 2018-12-17

# Uncropped gels with size marker indications

## FIGURE 7B

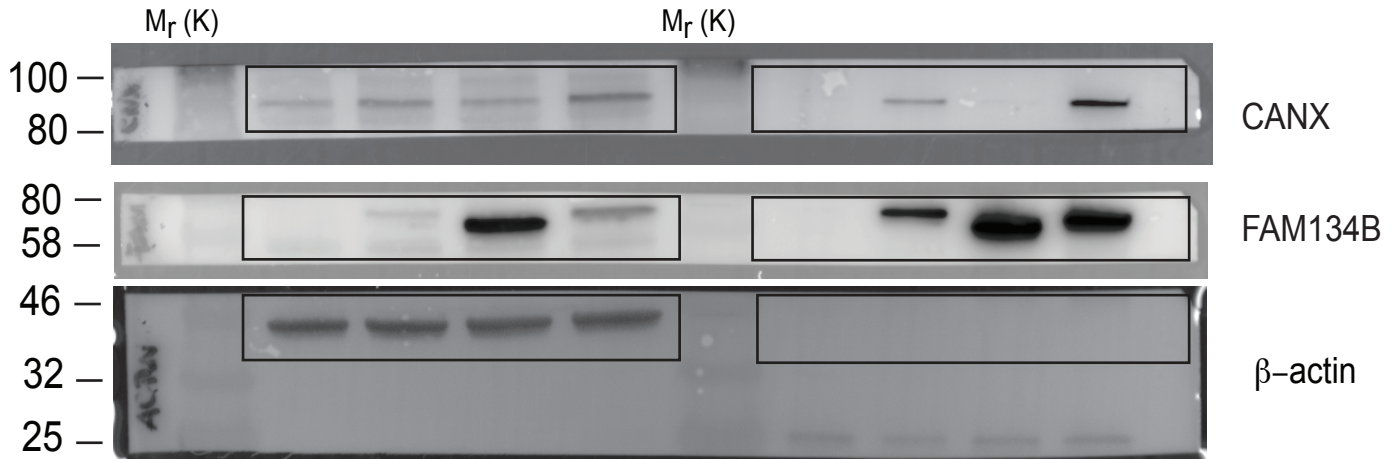

## FIGURE 7C

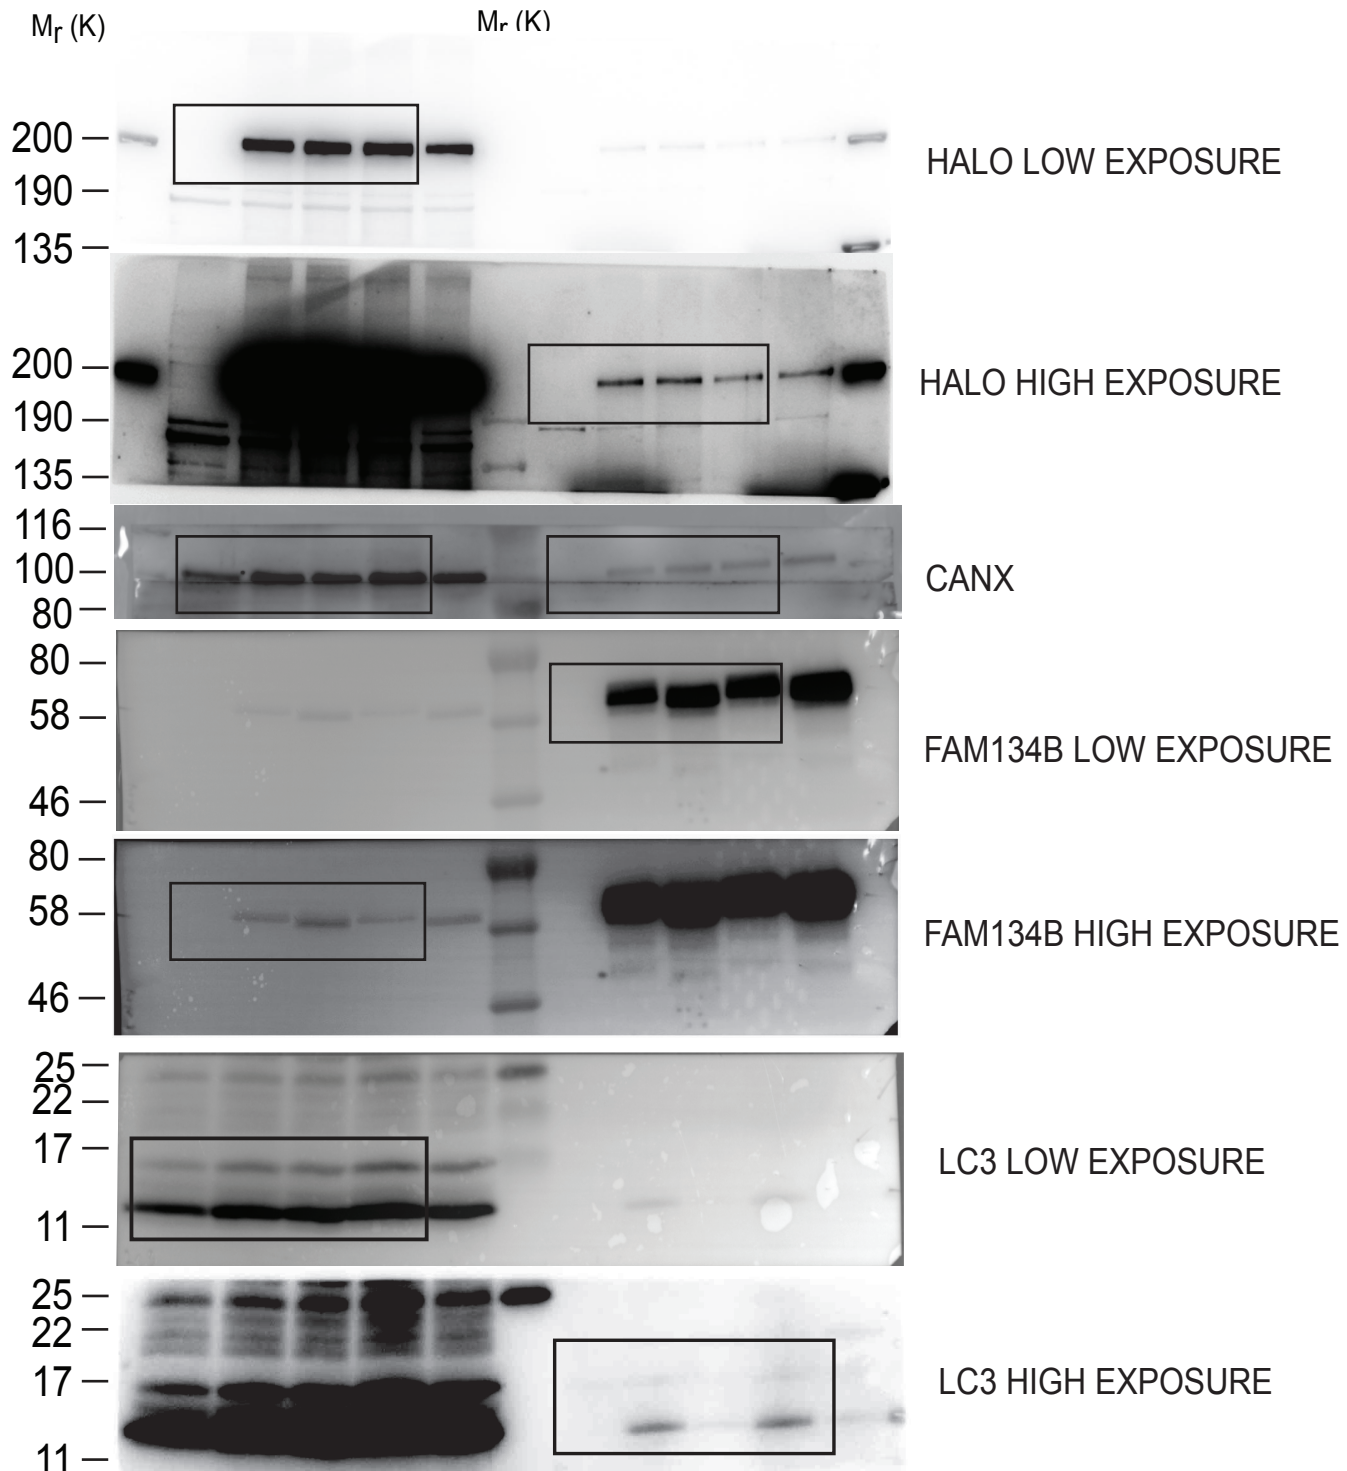

Supplement: EMBJ-38-e99847-s009.pdf [file EMBJ-38-e99847-s009.pdf]
